# Supplementary material
Source: ML conference proceedings conference paper supplement (https://openreview.net/forum?id=thLQd7uK3C)
Supplement: supplementary_material [file attachment]

The anonymized code for this paper is available at: <https://anonymous.4open.science/r/ConvFormer-7DBE/>
